# Supplementary material
Source: publisher figshare collection journal article supplement (https://acs.figshare.com/ndownloader/files/3727330)

# Protein Arginine Methyltransferase 8: Tetrameric Structure and Protein Substrate Specificity

Wei-Chao Lee,<sup>†</sup> Wen-Ling Lin,<sup>†</sup> Tsutomu Matsui,<sup>‡</sup> Eric S.-W. Chen,<sup>†</sup> Tong-You Wade Wei,<sup>†</sup> Wen-Hsuan Lin,<sup>†</sup> Hao Hu,<sup>§</sup> Yujun George Zheng,<sup>§</sup> Ming-Daw Tsai,<sup>†</sup> and Meng-Chiao Ho\*,<sup>†</sup>

## Supplementary Tables and Figures

**Table S1:** The statistics table for the tPRMT8 X-ray crystal structure

| Name                                           | tPRMT8                    |
|------------------------------------------------|---------------------------|
| PDB code                                       | 4X41                      |
| <b>Data collection</b>                         |                           |
| Resolution (Å)                                 | 25-3.49 (3.62-3.49) *     |
| Space group                                    | <i>P</i> 222 <sub>1</sub> |
| Unit-cell                                      |                           |
| <i>a</i> / <i>b</i> / <i>c</i> (Å)             | 68.2/78.2/203.9           |
| $\alpha$ / $\beta$ / $\gamma$ (°)              | 90/90/90                  |
| No. of reflections Measured                    | 13561 (1357)              |
| Completeness (%)                               | 94.8 (96.7)               |
| <i>R</i> <sub>sym</sub> (%) <sup>a</sup>       | 27.2 (72.4)               |
| Mean <i>I</i> /σ( <i>I</i> )                   | 3.9 (2.0)                 |
| Multiplicity                                   | 2.9 (2.8)                 |
| <b>Refinement</b>                              |                           |
| <i>R</i> <sub>work</sub> (%)                   | 23.1                      |
| <i>R</i> <sub>free</sub> (%)                   | 28.2                      |
| Geometry deviations                            |                           |
| Bond lengths (Å)                               | 0.005                     |
| Bond angles (°)                                | 1.02                      |
| No. of atoms / Mean B-values (Å <sup>2</sup> ) | 4998/55.3                 |
| Ramachandran plot (%)                          |                           |
| Most favored                                   | 93.0                      |
| Allowed                                        | 7.0                       |
| Disallowed                                     | 0.0                       |

Values in parentheses are for the highest resolution shell.

$$^a R_{\text{sym}} = \sum_{hkl} \sum_i |I_i(hkl) - \langle I(hkl) \rangle| / \sum_{hkl} \sum_i I_i(hkl).$$

**Table S2:** Data collection and scattering-derived parameters for tPRMT8

| <b>Data Collection Parameters</b>                     |                      |
|-------------------------------------------------------|----------------------|
| Instrument                                            | SSRL BL4-2           |
| Defining slits size (H mm x V mm)                     | 0.3 x 0.3            |
| Detector distance (m)                                 | 2.5                  |
| Wavelength (Å); energy (keV)                          | 1.127; 11            |
| Beam current (Å)                                      | 500                  |
| Q range (Å <sup>-1</sup> )                            | 0.007-0.46           |
| Exposure time per frame (s)                           | 1                    |
| Size of quartz capillary in diameter (mm)             | 1.5                  |
| Frame per FPLC experiment                             | 800                  |
| Amount loaded (μl)                                    | 100                  |
| Sample concentration (mg/ml)                          | 5.0                  |
| Temperature (K)                                       | 293                  |
| SEC column                                            | Superdex 200PC 3.2/3 |
| FPLC flow rate (ml/min)                               | 0.05                 |
| <b>Structural Parameters</b>                          |                      |
| Image frame used for analysis                         | 670-699              |
| Q region (Å <sup>-1</sup> )                           | 0.013-0.178          |
| I(0) from Guinier                                     | 476.70               |
| R <sub>g</sub> (Å) from Guinier                       | 44.31                |
| I(0) from $P(r)$                                      | 477.90               |
| R <sub>g</sub> (Å) from $P(r)$                        | 44.68                |
| D <sub>max</sub> (Å) from $P(r)$                      | 115.22               |
| R <sub>g</sub> (Å) from crystal structure             | 43.63                |
| D <sub>max</sub> (Å) from crystal structure           | 119                  |
| Porod Volume estimate from $P(r)$                     | 308,674              |
| Excluded volume from DAMMIF (Å <sup>3</sup> )         | 431,578.95           |
| Dry volume calculated from sequence (Å <sup>3</sup> ) | 210,564              |
| Calculated tetrameric molecular weight                | 166.23               |
| <b>Software employed</b>                              |                      |
| Primary data reduction                                | SasTool              |
| Data processing                                       | PRIMUS               |
| <i>Ab initio</i> analysis                             | DAMMIF               |
| Validation and averaging                              | DAMAVR               |
| Computation of model intensities                      | FoXS                 |

**Figure S1: Sequence alignment of PRMT1, Hmt1, PRMT8 and tPRMT8.** The sequence of the two PRMT8 constructs, PRMT8 and tPRMT8 are aligned with the full length PRMT1 and the yeast PRMT1 homolog, Hmt1. The conserved residues are marked with star and the highly similar and less similar residues are indicated by double and single dots respectively (generated by ClustalW2, EMBL-EBI).

|        |                                                               |     |
|--------|---------------------------------------------------------------|-----|
| PRMT8  | MSMKHSSRCLLLRKMAENAAESTEVNSPPSQPPQPVVPAKPVQC VHHVSTQPSCPGRGK  | 60  |
| tPRMT8 | -----                                                         |     |
| PRMT1  | -----MEVSCGQAE                                                | 9   |
| Hmt1   | -----                                                         |     |
| PRMT8  | MSKLLNPEEMTSRDYYFDSYAHFGIHEEMLKDEVRTLTYRNSMYHNKHVFKDKVVLVDVGS | 120 |
| tPRMT8 | MSKLLNPEEMTSRDYYFDSYAHFGIHEEMLKDEVRTLTYRNSMYHNKHVFKDKVVLVDVGS | 60  |
| PRMT1  | SSEKPNAEEDMTSKDYYFDSYAHFGIHEEMLKDEVRTLTYRNSMFHNRLFKDKVVLVDVGS | 69  |
| Hmt1   | -----DYYFDSYDHYGIHEEMLQDVRTLSYRNAIIQNKDLFKDKIVLVDVGC          | 47  |
|        | ***** *-*-*-*-*-*-*-*-*-*-*-*-*-*-*-*-*-*-*-*-*-*-*-*-*-*-*-* |     |
| PRMT8  | GTGILSMFAAKAGAKKVFGEICSSISDYSEKIIKANHLDNIIITIFKGKVEEVELPVEKVD | 180 |
| tPRMT8 | GTGILSMFAAKAGAKKVFGEICSSISDYSQKIIKANHLDNIIITIFKGKVEEVELPVEKVD | 120 |
| PRMT1  | GTGILCMFAAKAGARKVIGIECSSISDYAVKIVKANLKHVVTTIIGKVEEVELPVEKVD   | 129 |
| Hmt1   | GTGILSMFAAKHGAKHVIGVDMSSIIEMAKELVELNGFSDKITLLRGKLEDVHLPFPKVD  | 107 |
|        | *****-*-*-*-*-*-*-*-*-*-*-*-*-*-*-*-*-*-*-*-*-*-*-*-*-*-*-*   |     |
| PRMT8  | IIISEWMGYCLFYESMLNTVIFARDKWLKPGGLMFPDRAALYVVAIEDRQYKDFKIHWE   | 240 |
| tPRMT8 | IIISEWMGYCLFYESMLNTVIFARDKWLKPGGLMFPDRAALYVVAIEDRQYKDFKIHWE   | 180 |
| PRMT1  | IIISEWMGYCLFYESMLNTVLYARDKWLAPDGLIFPDRAATLYVTAIEDRQYKDYKIHWE  | 189 |
| Hmt1   | IIISEWMGYFLLYESMMDTVLYARDHYLVEGGLIFPDKCSIHLALEDSDQYKDEKLNWQ   | 167 |
|        | *****-*-*-*-*-*-*-*-*-*-*-*-*-*-*-*-*-*-*-*-*-*-*-*-*-*-*     |     |
| PRMT8  | NVYGFDMTCIRDVAMKEPLVDIVDPKQVVTNACLIKEVDIYTVKTEELSFTSAFCLQIQ   | 300 |
| tPRMT8 | NVYGFDMTCIRDVAMKEPLVDIVDPKQVVTNACLIKEVDIYTVKTEELSFTSAFCLQIQ   | 240 |
| PRMT1  | NVYGFDMSCIKDVAIKEPLVDVDPKQLVTNACLIKEVDIYTVKVEDLTFTSPFCLQVQR   | 249 |
| Hmt1   | DVYGFDYSPFVPLVLHEPIVDIVERNNVNTTSDKLIEFDLNTVKISDLAFKSNFKLTAKR  | 227 |
|        | *****-*-*-*-*-*-*-*-*-*-*-*-*-*-*-*-*-*-*-*-*-*-*-*-*-*       |     |
| PRMT8  | NDYVHALVTYFNIEF--TKCHKMGFSTAPDAPYTHWKQTVFYLEDYLTVRRGEEIYGTI   | 358 |
| tPRMT8 | NDYVHALVTYFNIEF--TKCHKMGFSTAPDAPYTHWKQTVFYLEDYLTVRRGEEIYGTI   | 298 |
| PRMT1  | NDYVHALVAYFNIEF--TRCHKRTGFSTSPESPYTHWKQTVFYMEDYLTVKTGEEIFGTI  | 307 |
| Hmt1   | QDMINGIVTWFDIVFPAPKGRPVEFSTGPHAPYTHWKQTFYFPDDLDAETGDTIEGEL    | 287 |
|        | *****-*-*-*-*-*-*-*-*-*-*-*-*-*-*-*-*-*-*-*-*-*-*-*-*         |     |
| PRMT8  | SMKPNAKNVRDLDFTVDLDFKGQLCETSVSN-----DYKMR                     | 394 |
| tPRMT8 | SMKPNAKNVRDLDFTVDLDFKGQLCETSVSN-----DYKMR                     | 334 |
| PRMT1  | GMRPNAKNVRDLDFTVDLDFKGQLCETSVSN-----DYRMR                     | 343 |
| Hmt1   | VCSPNEKNVRDLNLIKISYKFESNGIDGNSRSRKNEGSYIMH                    | 328 |
|        | *****-*-*-*-*-*-*-*-*-*-*-*-*-*-*-*-*-*-*-*-*-*-*-*           |     |

**Figure S2: Homotetramerization of tPRMT8:** The size exclusion chromatography profile of tPRMT8 at various buffers (left) and salt (right) conditions. The SEC profiles of tPRMT8 were almost identical with varying salt concentration and pH range.

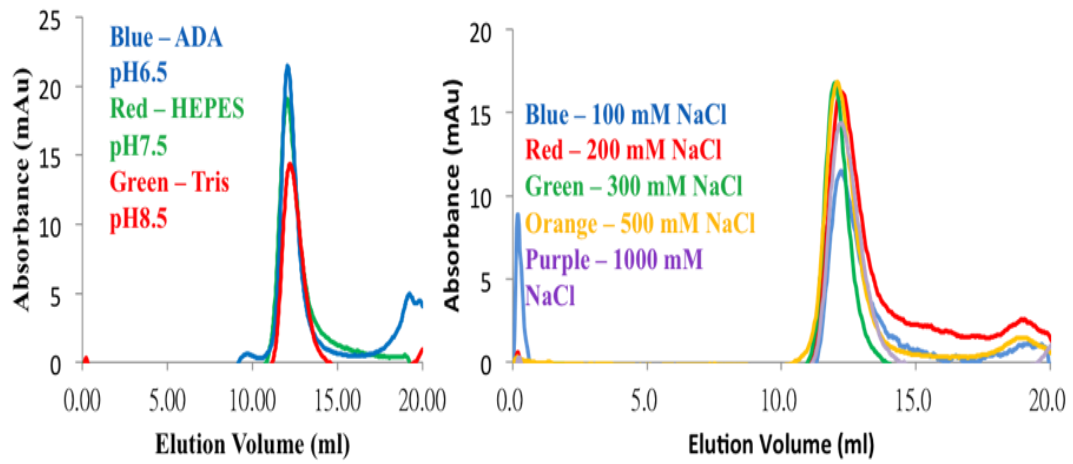

**Figure S3: The *in vitro* methylation of NIFK.** A) The methylated NIFK by tPRMT8 was digested by Lys-C protease followed by LS-MS/MS which shown 64% coverage. B). In LC-MS/MS spectra, Arg114 and Arg284 were mono-methylated. The Arg244 and Arg245 are close neighbors which leads to difficulties in identifying the methylated arginine and the degree of methylation.

A)

Matched peptides shown in **bold red**.

```

1  MATFSGPAGP ILSLNPQEDV EFQKEVAQVR KRITQRKKQE QLTPGVVYVR
51  HLPNLLDETQ IFSYFSQFGT VTRFRLSRSK RTGNSKGYAF VEFESQDAK
101 IVAETMNNYL FGERLLECHF MPPEKVHREL FKDWNIPFKQ PSYPSVKRYN
151 RNRTLQKLR MEERFKKKER LLRKKLAKKG IDYDFPSLIL QKTESISKTN
201 RQTSTKGQVL RKKKKKVSQT LDTPEKTVDS QGPTFVCTPT FLERRKSQVA
251 ELNDDDDKDE IVFKQPISCV KEEIQETQTP THSRKKRRRS SNQ

```

B)

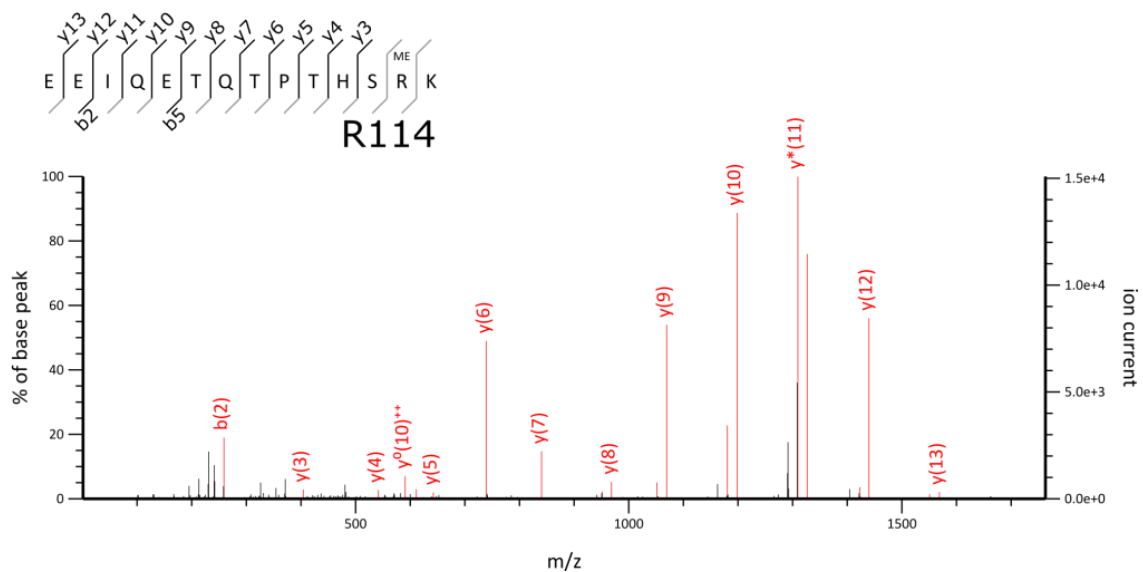

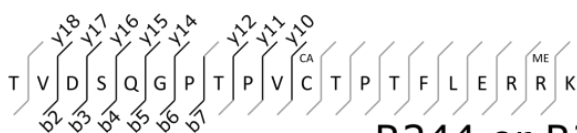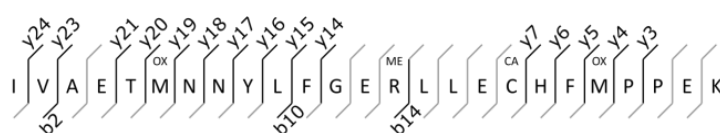

**Figure S4: tPRMT8C is structurally similar to tPRMT8**

A) The AUC overlay of tPRMT8 (black) and tPRMT8C (in red) indicates a similar profile that represents a major species consistent with a tetrameric form of ~160 kDa.

B) The CD spectra (left) of tPRMT8 (red triangle) overlay with tPRMT8C (blue square) suggests the secondary structures are very similar. The comparison of  $T_m$  values (right) for tPRMT8 (red triangle) with tPRMT8C (blue square) suggests tPRMT8c is less stable as the  $T_m$  value decreased by ~10°C.

A)

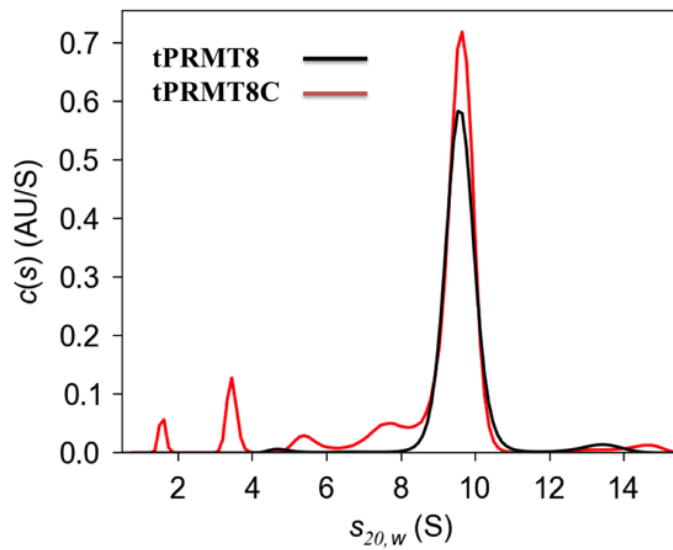

B)

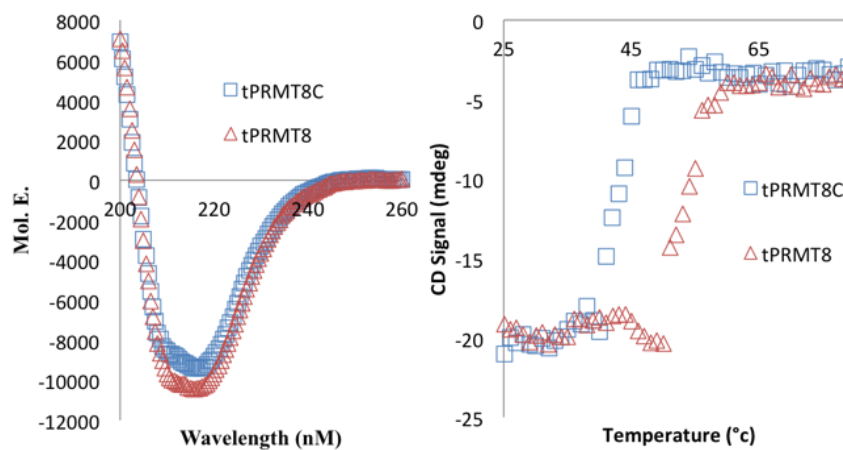

Supplement: Supplementary file 1 [file 3727330]
